# Supplementary material
Source: Springer Nature journal article supplement (https://www.springermedizin.de/resource/supplementary/12936_2010_1584_MOESM1_ESM.pdf/9541512)
Supplement: MOESM1 [file 9541512]

# Modifications des pratiques en matière de diagnostic et de traitement du paludisme chez les professionnels de la santé au Kenya

Elizabeth Juma<sup>1</sup>, Dejan Zurovac<sup>\*2,3,4</sup>

## A propos de cette traduction

Cette traduction a été réalisée en 2011 par BioMed Central en association avec RWS Group à partir de la parution d'origine en anglais : Juma E, Zurovac D: **Changes in health workers' malaria diagnosis and treatment practices in Kenya.** *Malaria Journal* 2011 10:1. <http://www.malariajournal.com/content/10/1/1>

## Résumé

**Contexte :** Au Kenya, le changement de politique en matière de traitement du paludisme non compliqué, passant du traitement par sulfadoxine-pyriméthamine à un traitement par artéméther-luméfantrine (AL), s'est accompagné d'une révision des recommandations préconisant un diagnostic présomptif de paludisme chez les enfants et, dans la mesure du possible, un diagnostic parasitologique et un respect des résultats des tests chez les enfants plus âgés et les adultes. Trois ans après la mise en œuvre de cette politique, l'attitude des professionnels de la santé relative au respect des recommandations concernant le diagnostic et le traitement du paludisme a été évaluée.

**Méthode :** Une étude nationale, transversale, avec échantillonnage par grappes, a été réalisée dans des établissements de santé publics. Les données ont été recueillies au moyen de méthodes d'évaluation de la qualité des soins. L'analyse s'est limitée aux établissements disposant de stocks d'AL. Les principaux critères d'évaluation étaient les pratiques en matière de diagnostic et de traitement pour les patients fébriles en ambulatoire, avec stratification selon l'âge, la disponibilité des méthodes de diagnostic, l'utilisation des tests de diagnostic du paludisme et les résultats des tests.

**Résultats :** L'analyse comprenait 1 096 patients fébriles (567 âgés de < 5 ans et 529 âgés de ≥ 5 ans) dans 88 établissements disposant de méthodes de diagnostic du paludisme, et 880 patients fébriles (407 âgés de < 5 ans et 473 âgés de ≥ 5 ans) dans 71 établissements ne disposant pas de méthodes de diagnostic du paludisme. Dans tous les établissements, 19,8 % des jeunes enfants et 28,7 % des patients âgés de ≥ 5 ans ont été testés, tandis que dans les établissements disposant de méthodes de diagnostic, 33,5 % et 53,5 % des patients ont été testés dans chaque groupe d'âge respectivement. Dans l'ensemble, le traitement par AL a été prescrit chez 63,6 % des enfants âgés de < 5 ans et 65,0 % des enfants âgés de ≥ 5 ans, alors que les monothérapies par amodiaquine ou sulfadoxine-pyriméthamine ont été prescrites chez seulement 2,0 % des enfants et 3,9 % des enfants plus âgés et des adultes. Chez les enfants âgés de < 5 ans, le traitement par AL a été prescrit chez 74,7 % des patients testés positifs, 40,4 % des patients testés négatifs et 60,7 % des patients n'ayant pas été testés. Chez les enfants âgés de ≥ 5 ans, le traitement par AL a été prescrit chez 86,7% des patients testés positifs, 32,8 % des patients testés négatifs et 58,0 % des patients n'ayant pas été testés. Au moins un traitement antipaludique a été prescrit chez 56,6 % des enfants et de 50,4 % des patients âgés ≥ 5 ans présentant un résultat de test négatif.

\*Correspondance : [dzurovac@nairobi.kemri-wellcome.org](mailto:dzurovac@nairobi.kemri-wellcome.org)

<sup>2</sup>Malaria Public Health and Epidemiology Group, KEMRI/Wellcome Trust Research Programme, PO Box 43640, 00100 GPO, Nairobi, Kenya

La liste complète des informations concernant les auteurs est disponible à la fin de ce document

**Conclusions :** Dans l'ensemble, la fréquence des examens de laboratoire pour le paludisme était faible et, malgré des recommandations différentes selon l'âge, les établissements disposant de méthodes de diagnostic n'ont observé que des différences modérées de la fréquence des tests entre les deux groupes d'âge. Dans les deux groupes d'âge, l'utilisation de l'AL était prédominante, et les traitements antipaludiques antérieurs inefficaces étaient quasi-inexistants. La grande majorité des patients testés positifs ont reçu le traitement recommandé par AL ; toutefois, les traitements antipaludiques chez les patients testés négatifs étaient répandus, le traitement par AL constituant le choix prédominant. Un récent changement de politique en matière de diagnostic pour un dépistage universel au Kenya représente une chance d'améliorer la qualité de la gestion des cas de paludisme. Ceci dépendra toutefois de la délivrance d'un module global de gestion des cas, comprenant une utilisation à grande échelle des tests de diagnostic, une formation de bonne qualité, un suivi post formation, des visites de supervision structurées et un contrôle plus intense.

### Contexte

Le respect des directives en matière de diagnostic et de traitement par les professionnels de la santé est l'un des aspects fondamentaux déterminant une mise en oeuvre efficace des politiques de gestion des cas de paludisme [1]. Conformément aux recommandations internationales [2], en 2004 la politique de traitement de première intention pour le paludisme non compliqué au Kenya est passée d'un traitement inefficace à base de sulfadoxine-pyriméthamine (SP) [3] à une combinaison thérapeutique à base d'artémisinine (ACT). Une ACT spécifique, l'artéméther-luméfántrine (AL), était recommandée pour les patients pesant 5 kg ou plus, la quinine était recommandée pour les enfants pesant moins de 5 kg et les femmes enceintes, la SP était réservée au traitement préventif intermittent (TPI) au cours de la grossesse, et l'amodiaquine (AQ), une ancienne option thérapeutique de seconde intention en échec [4] n'était plus recommandée pour le traitement du paludisme. Pour soutenir le changement de politique thérapeutique, les politiques de diagnostic du paludisme ont également été révisées afin de promouvoir le traitement présomptif de la fièvre chez les enfants de moins de cinq ans et, lorsque c'était possible, une utilisation de tests diagnostiques rapides (TDR) ou de la microscopie était recommandée pour le dépistage des patients fébriles âgés de cinq ans ou plus, en traitant par la suite par AL uniquement les patients ayant été testés positifs [5].

Fin 2006, la nouvelle politique de traitement était mise en place dans tout le pays [6]. Pour ce qui est du diagnostic du paludisme, les professionnels de la santé ont été formés à l'utilisation de TDR au cours d'une formation de gestion des cas en cours d'emploi ; toutefois, seules des quantités limitées de TDR ont été fournies, et la plupart des méthodes de diagnostic du paludisme dans ce pays reposaient sur la disponibilité de la microscopie pour le paludisme [7]. Les résultats provenant de plusieurs études [8-10] visant à évaluer le respect par les professionnels de la santé des directives selon l'âge au cours de la phase précoce d'instauration du traitement par AL ont révélé que : 1) l'utilisation globale d'AL était

faible dans les deux groupes d'âge, avec une prédominance des prescriptions non recommandées d'AQ, SP et leurs associations ; 2) le diagnostic parasitologique était insuffisamment utilisé chez les enfants plus âgés et les adultes, tandis que, contrairement aux recommandations de diagnostic, une grande proportion de jeunes enfants étaient testés ; 3) les prescriptions d'AL ont largement suivi les résultats des tests et les recommandations ; la plupart des patients testés négatifs ont pourtant toujours été traités pour le paludisme, principalement au moyen de traitements alternatifs et non recommandés.

Entre 2007 et 2009, la Kenyan Division of Malaria Control (*Service kenyan pour le contrôle du paludisme*) a renforcé les pratiques des professionnels de la santé en matière de gestion des cas pour le respect des directives sur la gestion des cas. Dans cet article, les pratiques en matière de diagnostic et de traitement du paludisme observées au cours de l'étude nationale sur la gestion des cas de paludisme menée en 2010 ont été rapportées, environ trois ans après la mise en oeuvre au niveau national de la nouvelle politique de traitement par AL.

### Méthodes

#### Plan de l'étude et recueil des données

Une étude transversale, dans les établissements de santé, avec échantillonnage par grappes, a été menée dans des établissements de santé publics kényans entre le 18 janvier et le 12 février 2010. Parmi les 6 094 établissements publics kényans, les catégories d'établissements suivantes ont été exclues du cadre d'échantillonnage : 1) les établissements de la province de Nairobi en raison de l'absence de transmission de paludisme et de la nécessité d'études spécifiques pour évaluer la gestion des cas de paludisme, 2) les hôpitaux tertiaires car ceux-ci servent principalement d'établissements de référence, et 3) les établissements qui ne sont pas gérés le Ministère de la Santé (MdS) ou les autorités locales car ils offrent des services à des groupes de patients particuliers comme les militaires ou les prisonniers. Au total, 861 établissements ont été exclus. Notre cadre d'échantillonnage comprenait

par conséquent 5 233 établissements de santé. Pour les besoins de l'échantillonnage, les établissements appartenant à des organisations non gouvernementales ou religieuses ont été placés dans une seule catégorie. De même, les établissements gérés par le MdS et les autorités locales ont été regroupés dans la catégorie gouvernementale, tout comme de plus petites structures telles que des dispensaires et des centres de soins qui constituaient également une seule catégorie. Par conséquent, dans chacune des sept provinces, quatre strates reposant sur le type d'établissement (hôpitaux versus structures plus petites) et de mode de gestion (gouvernementale par rapport à non gouvernementale/religieuse) ont été formées. Enfin, à partir de chacune des 28 strates, un échantillon unique et aléatoire proportionnel au nombre d'établissements dans une strate a été constitué. Une grappe a été définie comme l'ensemble des rencontres en ambulatoire entre les professionnels de la santé et les patients, survenant au cours d'une journée d'étude.

Les données de chaque établissement ont été recueillies sur une seule journée d'étude à l'aide d'un éventail de méthodes d'évaluation de la qualité des soins, comprenant des évaluations de l'établissement de santé de santé, les entretiens avec le personnel de santé, ainsi que les entretiens de sortie avec les patients et leurs aidants. Tout d'abord, tous les patients se présentant au service des consultations externes ont été soumis à un dépistage rapide lorsqu'ils étaient prêts à quitter l'établissement. Les patients qui n'avaient pas été adressés, qui n'étaient pas enceintes (pour les femmes), pesant 5 kg ou plus et se présentant pour une consultation initiale en ambulatoire en raison d'une fièvre ont été soumis à un entretien approfondi. Les informations, pertinentes pour ce rapport, concernant l'âge, la taille, la température, les principaux symptômes du patient, les tests diagnostiques habituels de paludisme requis, les comptes-rendus des résultats ainsi que les médicaments prescrits, ont été recueillies au cours de l'entretien de sortie et à partir de la carte détenue par le patient. Deuxièmement, chaque établissement a été évalué afin de déterminer la disponibilité le jour de l'étude d'antipaludiques, antibiotiques, TDR du paludisme et d'un service de microscopie fonctionnelle pour le paludisme. Enfin, à la fin de la journée de travail, tous les professionnels de la santé, qui avaient examiné les patients recrutés le jour de l'étude, ont été interrogés afin de recueillir des informations concernant leurs données démographiques et leur expérience des interventions de gestion des cas de paludisme. Un consentement éclairé écrit a été obtenu pour tous les participants.

#### **Définitions et approches analytiques**

Les définitions de l'étude répondent aux directives nationales pour la prise en charge du paludisme non

compliqué, en vigueur au moment de l'étude [11]. En résumé, les directives recommandent que, dans les zones à haut risque de paludisme, tous les enfants de moins de cinq ans présentant une fièvre ou un antécédent de fièvre reçoivent un traitement présomptif par AL. Dans les zones à faible risque de paludisme, le traitement présomptif par AL est recommandé chez tous les enfants fébriles en l'absence de rougeole, écoulement nasal et autres causes évidentes de fièvre. En vue de la prise en charge clinique, toutes les régions du Kenya ont été classées comme zones à haut risque de paludisme, à l'exception des hautes terres des provinces du centre et de Nairobi. Chez les patients âgés de cinq ans ou plus, et quel que soit le risque de paludisme, tous les patients fébriles en l'absence d'une autre cause évidente de fièvre devront être testés pour le paludisme (microscopie ou TDR), et seuls les patients testés positifs seront traités par AL. Dans le même groupe d'âge, un traitement présomptif par AL est recommandé en l'absence de diagnostic de paludisme

Par conséquent, pour répondre aux critères relatifs aux tests et au traitement par AL, l'ensemble des analyses s'est limité aux patients fébriles, qui n'étaient pas enceintes (pour les femmes), pesant 5 kg ou plus, et se présentant pour une consultation initiale en ambulatoire sans avoir été adressé ou admis pour une hospitalisation. Les patients âgés de cinq ans ou plus, présentant une autre cause évidente de fièvre, ainsi que les enfants de moins de cinq ans répondant aux mêmes critères dans les zones à faible risque, étaient exclus de l'analyse. Une autre cause évidente de fièvre était définie comme une présentation concomitante, chez des patients fébriles d'écoulement nasal, de mal de gorge, de candidose buccale, de lésions, de problème urinaire, de problème cutané ou d'abcès. La fièvre a été définie comme une température axillaire  $\geq 37,5^{\circ}\text{C}$  ou un antécédent de fièvre au cours de la présente maladie.

Afin de garantir une évaluation comparable des pratiques en matière de traitement antipaludique en fonction des recommandations différentes selon l'âge pour le diagnostic du paludisme, l'analyse portait principalement sur les observations dans les établissements de santé disposant de stocks d'AL au cours de l'étude, avec une stratification selon la disponibilité des méthodes de diagnostic et l'âge des patients (moins de cinq ans ou cinq ans et plus). Dans les établissements disposant de méthodes de diagnostic, les pratiques en matière de traitement antipaludique ont été de nouveau stratifiées selon l'utilisation de tests de diagnostic du paludisme et les résultats des tests des patients. Les résultats de la microscopie et des TDR sont présentés combinés étant donné que le faible nombre de patients soumis à des TDR du paludisme excluait une analyse significative stratifiée selon le type de diagnostic.

**Tableau 1 Taux de test de diagnostic du paludisme chez des patients fébriles âgés de moins et de plus de 5 ans**

| Tous les établissements de santé                                            | Âgés de < 5 ans<br>(N = 974) |           | Âgés de ≥ 5 ans<br>(N = 1 002) |           | Tous les groupes d'âge<br>(N = 1 976) |           |
|-----------------------------------------------------------------------------|------------------------------|-----------|--------------------------------|-----------|---------------------------------------|-----------|
|                                                                             | n (%)                        | IC 95 %   | n (%)                          | IC 95 %   | n (%)                                 | IC 95 %   |
| Testés pour le paludisme                                                    | 193 (19,8)                   | 14,3-25,3 | 288 (28,7)                     | 21,8-35,7 | 481 (24,3)                            | 19,0-29,7 |
| Établissements de santé disposant<br>de méthodes de diagnostic du paludisme | < 5 ans<br>(N = 567)         |           | ≥ 5 ans<br>(N = 529)           |           | Tous les groupes d'âge<br>(N = 1 096) |           |
|                                                                             | n (%)                        | IC 95 %   | n (%)                          | IC 95 %   | n (%)                                 | IC 95 %   |
| Testés pour le paludisme                                                    | 190 (33,5)                   | 25,1-42,0 | 284 (53,7)                     | 45,4-61,9 | 474 (43,2)                            | 36,4-50,1 |

La saisie et la gestion des données ont été réalisées à l'aide d'Access (Microsoft, États-Unis), avec des écrans de saisie des données personnalisés avec des contrôles d'étendue et de cohérence intégrés. Tous les formulaires ont été saisis deux fois par des employés de saisie des données indépendants, et les dossiers des données ont été comparés afin de détecter les erreurs à l'aide d'un programme de vérification et en se reportant aux questionnaires originaux. Toutes les analyses ont été réalisées à l'aide du logiciel STATA, version 11. La précision des proportions (intervalle de confiance à 95 % [IC]) a été déterminée après correction de l'échantillonnage en grappes au niveau de l'établissement de santé.

#### Approbation éthique

L'approbation éthique pour cette étude a été octroyée par le Comité d'éthique et de recherche du Kenyatta National Hospital/Université de Nairobi (numéro de référence KNH-ERC/A/383).

#### Résultats

##### Description de l'échantillon

Cette étude a été menée dans 174 établissements de santé publics, dont la majorité (70,1 %) étaient des établissements gérés par le gouvernement, suivie d'établissements gérés par des organisations religieuses (25,9 %) et non gouvernementales (1,2 %). La plupart des établissements étaient des dispensaires (70,1 %), tandis que les centres de santé et les hôpitaux représentaient respectivement 18,4 % et 11,5 % des établissements. Un diagnostic parasitologique du paludisme était disponible le jour de l'étude dans 96 établissements (55,2 %), avec une utilisation plus fréquente de la microscopie (88/96 ; 91,7 %) que des TDR (13/96 ; 13,5 %). Cinq établissements de santé disposaient des deux méthodes de diagnostic. L'AL était disponible dans 94,3 % des établissements, alors que les comprimés de SP, les injections de quinine et les comprimés de quinine étaient en stock dans respectivement 88,5 %, 77,6 % et 69,0 % des établissements. Le traitement par AQ non recommandé était disponible dans seulement 23,6 % des établissements.

Les pratiques en matière de diagnostic et de traitement du paludisme ont été analysées chez 1 976 patients

fébriles remplissant les critères d'inclusion (974 âgés de < 5 ans et 1 002 âgés de ≥ 5 ans), dans 159 établissements où l'AL était en stock le jour de l'étude. Dans cinq établissements où l'AL était en stock, aucun patient fébrile répondant aux critères d'inclusion n'a été vu le jour de l'étude. Parmi ces 1 976 patients fébriles, 1 096 (567 âgés de < 5 ans et 529 âgés ≥ 5 ans) ont été reçus dans 88 établissements disposant d'aide au diagnostic du paludisme. Les 880 patients restants (407 âgés de < 5 ans et 473 âgés ≥ 5 ans) ont été reçus dans 71 établissements ne disposant pas de méthodes de diagnostic du paludisme.

#### Taux de positivité pour les tests de routine et les tests pour le paludisme

Le tableau 1 présente les taux des tests de paludisme selon l'âge pour 1 976 patients fébriles reçus dans l'ensemble des établissements de l'étude et 1 096 patients examinés dans les établissements disposant d'aide au diagnostic du paludisme. Dans l'ensemble des établissements, 24,3 % (IC 95 % : 19,0-29,7) des patients fébriles ont été testés. Dans les établissements disposant d'aide au diagnostic du paludisme, 43,2 % (IC 95 % : 36,4-50,1) des patients fébriles ont été testés. Parmi les patients âgés de ≥ 5 ans, 53,7 % (IC 95 % : 45,4-61,9) des enfants les plus âgés et des adultes ont été testés dans des établissements disposant d'une aide au diagnostic. Fait intéressant, dans ces mêmes établissements, 33,5 % (IC 95 % : 25,1-42,0) des enfants de < 5 ans avaient également été soumis à un test parasitologique. Parmi les patients testés, le taux de positivité des tests de routine pour le paludisme était de 54,0 % (IC 95 % : 45,4-62,6), avec une proportion plus élevée, bien que non statistiquement significative, chez les enfants plus âgés et les adultes (58,1 % ; IC 95 % : 46,9-69,3) par rapport aux enfants < 5 ans (47,9 % ; IC 95 % : 38,3-57,5).

#### Les pratiques en matière de traitement antipaludique pour les enfants fébriles âgés de moins de cinq ans

Le tableau 2 présente les pratiques en matière de traitement antipaludique pour les enfants fébriles âgés de < 5 ans, avec stratification selon la disponibilité des méthodes de diagnostic, l'utilisation d'un test de

**Tableau 2 Pratiques en matière de traitement antipaludique pour les enfants fébriles âgés de < 5 ans, avec stratification selon la disponibilité des méthodes de diagnostic, l'utilisation d'un test de diagnostic du paludisme et le résultat de ce test**

|                            | Établissements de santé disposant de méthodes de diagnostic |                            |                                 | Établissements de santé ne disposant pas de méthodes de diagnostic | Ensemble des établissements de santé |
|----------------------------|-------------------------------------------------------------|----------------------------|---------------------------------|--------------------------------------------------------------------|--------------------------------------|
|                            | Test positif<br>N = 91 (%)                                  | Test négatif<br>N = 99 (%) | Test non réalisé<br>N = 377 (%) | Tous les enfants<br>N = 407 (%)                                    | Total<br>N = 974 (%)                 |
| AL                         | 68 (74,7)                                                   | 40 (40,4)                  | 229 (60,7)                      | 282 (69,3)                                                         | 619 (63,6)                           |
| AL+QN                      | 17 (18,7)                                                   | 6 (6,1)                    | 22 (5,8)                        | 16 (4,0)                                                           | 61 (6,3)*                            |
| QN                         | 5 (5,5)                                                     | 3 (3,0)                    | 10 (2,7)                        | 8 (2,0)                                                            | 26 (2,7)                             |
| SP                         | 0                                                           | 5 (5,1)                    | 8 (2,1)                         | 1 (0,3)                                                            | 14 (1,4)                             |
| AQ                         | 0                                                           | 2 (2,0)                    | 4 (1,1)                         | 0                                                                  | 6 (0,6)                              |
| QN+SP                      | 1 (1,1)                                                     | 0                          | 0                               | 0                                                                  | 1 (0,1)                              |
| Aucun AP prescrit          | 0                                                           | 43 (43,4)                  | 104 (27,6)                      | 100 (24,6)                                                         | 247 (25,4)                           |
| N'importe quel AP prescrit | 91 (100)                                                    | 56 (56,6)                  | 273 (72,4)                      | 307 (75,4)                                                         | 727 (74,6)                           |
| Antibiotique prescrit      | 70 (76,9)                                                   | 89 (89,9)                  | 281 (74,5)                      | 329 (80,8)                                                         | 769 (79,0)                           |

\* Tous les traitements à base de QN faisant partie du traitement AL+QN comprennent l'administration de quinine injectable  
AL = artéméter-luméfantrine, AQ = amodiaquine, SP = sulfadoxine-pyriméthamine, QN = quinine, AP = antipaludique

diagnostic du paludisme et le résultat de ce test. Dans l'ensemble, la grande majorité des enfants fébriles ont reçu le traitement par AL recommandé (63,6 % ; IC 95 % : 58,5-68,6) ; 9 % (IC 95 % : 5,8-12,1) ont reçu le traitement non recommandé à base de quinine ou de quinine associée à l'AL (AL+QN) ; seuls 2 % (IC 95 % : 0,5-3,6) ont reçu une monothérapie inefficace par AQ ou SP ; 25,4 % (IC 95 % : 20,9-29,8) n'ont reçu aucun traitement contre le paludisme.

Parmi les enfants présentant un résultat positif, un traitement antipaludique a été prescrit à l'ensemble de ces patients et 74,7 % (IC 95 % : 61,0-88,5) des enfants ont été traités par AL, 18,7 % (IC 95 % : 6,5-30,9) par AL+QN et 5,5 % (IC 95 % : 0,8-10,2) par quinine seule. Il convient de noter qu'aucun des enfants avec un test positif n'a reçu une monothérapie inefficace par AQ ou SP (Tableau 2). Fait intéressant, parmi les enfants présentant un test négatif, un traitement par AL a été prescrit chez 40,4 % (IC 95 % : 26,6-54,3), 9,1 % (IC 95 % : 2,5-15,7) ont été traités par AL+QN ou quinine seule, et 7,1% (IC 95 % : 0-15,4) ont reçu une monothérapie par AQ ou SP. Au moins un médicament antipaludique a été prescrit chez 56,6 % (IC 95 % : 43,1-70,0) des enfants testés négatifs. Le traitement par AL était également prédominant chez les enfants n'ayant pas passé de tests dans les établissements disposant d'aide au diagnostic (60,7 % ; IC 95 % : 51,2-70,3) et ne disposant pas d'aide au diagnostic (69,3 % ; IC 95 % : 62,1-76,5). Enfin, pour toutes les catégories de patients, plus de 75 % des enfants ont reçu des antibiotiques (Tableau 2).

#### Pratiques en matière de traitement antipaludique chez des patients fébriles âgés de cinq ans ou plus

Le tableau 3 présente les pratiques en matière de traitement antipaludique pour les patients fébriles âgés de cinq ans ou plus, avec stratification selon la

disponibilité des méthodes de diagnostic, l'utilisation d'un test de diagnostic du paludisme et le résultat de ce test.

Pour toutes les catégories de patients, les modèles des traitements antipaludiques observés de ce groupe d'âge étaient analogues à ceux observés chez les enfants de moins de cinq ans. En résumé, près des deux tiers de l'ensemble des patients ont été traités par AL (65,0 % ; IC 95 % : 59,8-70,1), les traitements par monothérapie inefficace par AQ ou SP étaient très rares (3,9 % ; IC 95 % : 1,7-6,1), au moins un médicament antipaludique a été prescrit chez la moitié des patients avec un test négatif (50,4 % ; IC 95 % : 38,6-62,3), l'AL s'est avérée le traitement de choix pour les patients avec un test positif (86,7 % ; IC 95 % : 79,8-93,5) mais a également été fréquemment utilisé chez les patients avec un test négatif (32,8 % ; IC 95 % : 20,6-44,9), et ceux n'ayant pas passé de test dans les établissements disposant d'une aide au diagnostic (58,0 % ; IC 95 % : 46,6-69,3) et ne disposant pas d'une aide au diagnostic (69,1 % ; IC 95 % : 61,7-76,5). 68,9 % (IC 95 % : 64,8-73,0) des patients ont été traités par antibiotiques, pourtant en contradiction avec les recommandations chez les patients de moins de cinq ans, le traitement par AL+ QN non recommandé était moins fréquent chez les patients avec un test positif (7,3 % ; IC 95 % : 2,1-12,4).

## Discussion

### Respect des recommandations relatives aux tests

Entre 2006 et 2009, le Kenya a encouragé une politique de diagnostic du paludisme en recommandant des tests parasitologiques pour les enfants fébriles plus âgés et les adultes, et un diagnostic de présomption chez les jeunes enfants. Les résultats de cette étude de 2010 ont révélé de faibles taux de tests sans différence notable entre les enfants âgés de moins de cinq ans (20 %) et les enfants

**Tableau 3 Pratiques en matière de traitement antipaludique pour les patients fébriles âgés de 5 ans ou plus, avec stratification selon la disponibilité des méthodes de diagnostic, l'utilisation d'un test de diagnostic du paludisme et le résultat de ce test**

|                            | Établissements de santé disposant de méthodes diagnostiques |                             |                                 | Établissements de santé ne disposant pas de méthodes diagnostiques | Ensemble des établissements de santé |
|----------------------------|-------------------------------------------------------------|-----------------------------|---------------------------------|--------------------------------------------------------------------|--------------------------------------|
|                            | Test positif<br>N = 165 (%)                                 | Test négatif<br>N = 119 (%) | Test non réalisé<br>N = 245 (%) | Tous les patients<br>N = 473 (%)                                   | Total<br>N = 1 002 (%)               |
| AL                         | 143 (86,7)                                                  | 39 (32,8)                   | 142 (58,0)                      | 327 (69,1)                                                         | 651 (65,0)                           |
| SP                         | 1 (0,6)                                                     | 16 (13,5)                   | 9 (3,7)                         | 12 (2,5)                                                           | 38 (3,8)                             |
| AL+QN                      |                                                             | 12 (7,3)                    | 2 (1,7)                         | 0                                                                  | 16 (3,4)                             |
| QN                         | 6 (3,6)                                                     | 2 (1,7)                     | 1 (0,4)                         | 7 (1,5)                                                            | 16 (1,6)                             |
| AQ                         | 0                                                           | 1 (0,8)                     | 0                               | 0                                                                  | 1 (0,1)                              |
| Autre AP                   |                                                             | 1 (0,6)                     | 0                               | 1 (0,4)                                                            | 2 (0,4)                              |
| Aucun AP prescrit          |                                                             | 2 (1,2)                     | 59 (49,6)                       | 92 (37,6)                                                          | 109 (23,0)                           |
| N'importe quel AP prescrit |                                                             | 163 (98,8)                  | 60 (50,4)                       | 153 (62,5)                                                         | 364 (77,0)                           |
| Antibiotique prescrit      |                                                             | 90 (54,6)                   | 92 (82,4)                       | 169 (69,0)                                                         | 333 (70,4)                           |
|                            |                                                             |                             |                                 |                                                                    | 690 (68,9)                           |

\*Tous les traitements à base de QN comprennent l'administration de quinine injectable

†L'autre traitement antipaludique comprend dihydroartémisinine (2), QN + SP (1) et AL + SP (1)

AL = artéméter-luméfantine, AQ = amodiaquine, SP = sulfadoxine-pyriméthamine, QN = quinine, AP = antipaludique

plus âgés et les adultes (29 %). Alors que l'absence de méthodes de diagnostic du paludisme dans près de la moitié des établissements en raison d'une mise en place partielle des TDR fournit une explication pour les faibles taux de tests chez les enfants plus âgés et les adultes, les pratiques en matière de tests observées dans les établissements disposant de méthodes de diagnostic méritent d'être signalées. Dans ces établissements, malgré l'augmentation des taux de tests par rapport à l'ensemble des établissements, les taux de tests pour les enfants plus âgés et les adultes fébriles n'ont pas dépassé 54 % et, contrairement aux recommandations concernant le traitement présomptif des enfants âgés de moins de 5 ans, 34 % de ces enfants étaient toujours testés. Les schémas de tests observés dans cette étude correspondent à ceux rapportés à partir d'études menées au début la mise en place des traitements par AL au Kenya, ce qui semble indiquer une utilisation insuffisante des tests chez les enfants plus âgés et les adultes ainsi qu'une présence importante des tests chez les enfants âgés de moins de cinq ans [9].

La formation en cours d'emploi de la gestion des cas de paludisme pour les professionnels de la santé, la principale activité de mise en oeuvre permettant de renforcer les recommandations selon l'âge pour les tests de diagnostic du paludisme entre 2007 et 2009, mérite une attention particulière. Les questions relatives à la qualité de la formation en cours d'emploi et les messages flous ou erronés concernant la gestion des cas, communiqués aux professionnels de la santé au début de la mise en place du traitement par AL en 2006, ont été précédemment rapportées [12]. Malgré la normalisation de la formation entre 2007 et 2009 grâce au développement d'un curriculum unique [13], force est de reconnaître qu'il est peu probable que le programme de formation à grande échelle, en cascade, concernant plus

de 20 000 professionnels de la santé dans plus de 500 séances de formation, et mis en oeuvre par 15 organisations différentes, soit suffisant pour garantir une qualité uniforme de la formation, et pour entraîner des changements de pratiques s'il n'est pas accompagné d'un suivi post-formation et une supervision de soutien structurée. Malheureusement, ces derniers aspects, rarement présents tout au long du processus de mise en oeuvre des politiques, constituent les maillons faibles des activités de gestion des cas.

Toutefois, en 2010, le Kenya a changé ses recommandations en matière de politique de diagnostic et de gestion des cas pour des recommandations claires de diagnostic parasitologiques chez tous les patients fébriles, quelle que soit la catégorie d'âge [14]. Par conséquent, sur un plan plus positif, les pratiques contraires aux recommandations chez les jeunes enfants, comme suggérées dans cette étude, peuvent être considérées comme un point de départ positif dans le cadre de cette nouvelle politique. Actuellement, dans les établissements disposant de méthodes de diagnostic, seuls 43 % de tous les patients fébriles sont testés. Pourtant, lorsque l'on compare ce chiffre avec les résultats rapportés dans des études similaires, les tests sont plus couramment utilisés qu'en Ouganda (40 % de patient testés) [15], en Angola (31 %) [16], en Zambie (27 %) [17] et en Tanzanie (27 %) [18]. Après l'abandon de la recommandation de diagnostic présomptif chez les jeunes enfants au Kenya dans les directives et la pratique, on estime que la future mise en oeuvre d'un module global de gestion des cas reposant sur une mise en place à grande échelle des TDR, en mettant l'accent sur le suivi post-formation et les activités de supervision structurées, permettrait d'améliorer le respect par les professionnels de la santé des nouvelles recommandations relatives aux tests.

### **Changement des pratiques en matière de traitement : de traitements antipaludiques inefficaces au traitement par AL**

Les résultats de cette analyse, trois ans après la distribution l'AL aux établissements de santé kényans, ont montré que les pratiques en matière de traitement par AL ont prévalu sur les autres traitements antipaludiques dans les deux groupes d'âge (64 % chez les jeunes enfants et 65 % chez les enfants plus âgés et adultes). Même si certaines pratiques sont encore contraires aux recommandations, il est important de noter que l'utilisation des monothérapies inefficaces, par SP ou AQ par exemple, est pratiquement inexistante. Toutefois, l'utilisation du traitement non recommandé associant AL et quinine était particulièrement répandue chez les enfants de moins de cinq ans testés positifs (18 %). Ces observations révèlent un changement radical des pratiques en matière de traitement par rapport à ce qui avait été rapporté au début de la mise en place du traitement par AL, caractérisé par une faible utilisation de l'AL dans les deux groupes d'âge, avec une prédominance des pratiques pour une prescription des traitements non recommandés par AQ, SP et de leurs associations [8-10].

Il y a plusieurs explications possibles pour ces comportements. Premièrement, malgré le changement de politique et l'accès des établissements périphériques à l'AL, l'arrêt des anciennes pratiques en matière de traitement et la conversion des nouvelles politiques en pratique clinique recommandée, se révèlent être un processus relativement lent. Les lents changements des pratiques en matière de traitement observés au cours des phases précoces et tardives du processus de mise en place du traitement par AL en Zambie [19] vont dans le même sens. Deuxièmement, il est probable que la diminution de la disponibilité du traitement non recommandé par AQ dans les établissements kényans constitue un autre facteur décisif qui empêchera les professionnels de la santé de choisir des traitements inefficaces. Dans des études précédentes, les mêmes observations ont été rapportées concernant la disponibilité de la chloroquine en Ouganda dans le cadre de la politique d'utilisation de l'ACT [20] et même au Kenya dans le cadre de la politique de SP précédente [21]. Troisièmement, les messages de formation erronés sur l'efficacité satisfaisante de l'AQ et son rôle éventuel dans la gestion des cas, initialement délivrés aux professionnels de la santé lors de la phase précoce de mise en œuvre [12] ont été corrigés au fil du temps. Enfin, pour ce qui est de l'émergence de l'utilisation de l'association AL+QN chez les patients testés positifs, les précédentes études au Kenya ont fréquemment montré que les patients présentant des pathologies plus susceptibles d'être le paludisme sont plus fréquemment traités au moyen de traitements de seconde attention ou de médicaments perçus par les

professionnels de la santé comme étant des traitements plus forts contre le paludisme [12,22]. En outre, ce schéma étant prédominant chez les jeunes enfants chez qui les symptômes de vomissements sont fréquents, l'utilisation de la quinine par voie intramusculaire associée à l'AL pourrait être expliquée comme étant une stratégie de traitement de la part du professionnel de la santé afin de diminuer le risque de non-observance du patient. Pourtant, il s'agit là d'une pratique qui doit être découragée, et l'accent chez les patients présentant une maladie fébrile non sévère devra être mis sur un traitement oral par AL, la première dose étant administrée au sein même de l'établissement, sous observation directe.

### **Défis relatifs au respect des recommandations pour les résultats des tests négatifs**

Les pratiques en matière de traitement antipaludique pour les patients avec un test négatif méritent une attention particulière étant donné que le fait de ne pas respecter les résultats négatifs des tests compromet sérieusement la rentabilité des stratégies de gestion des cas de paludisme reposant sur les tests [23]. Ces résultats révèlent qu'une proportion de patients avec un test négatif, s'élevant à 58 % chez les jeunes enfants et 50 % chez les enfants plus âgés et adultes, est traitée pour le paludisme. Dans les deux groupes d'âge, le traitement prédominant pour les patients avec un test négatif était l'AL. Il a été précédemment rapporté qu'au Kenya, au début de la phase précoce d'instauration, les prescriptions d'AL suivaient en grande partie les résultats des tests [9] alors que les autres traitements antipaludiques étaient réservés à des patients avec un test négatif. Dans cette étude, on a remarqué que les observations initiales encourageantes de respect des recommandations dans la plupart des traitements par AL en ce qui concerne les résultats de tests négatifs ont été inversées trois ans plus tard lorsqu'une grande majorité des patients avec un test négatif étaient en fait traités par AL.

Il y a plusieurs explications possibles pour ces comportements dans cette étude. Alors que chez les jeunes enfants, le non-respect des recommandations concernant les patients avec un test négatif pourrait s'expliquer par l'encouragement du traitement présomptif (mais sans test) au cours de la période de l'étude, l'ampleur des pratiques en désaccord avec les directives mises en œuvre est préoccupante chez les enfants plus âgés et les adultes. La diminution de la disponibilité du traitement par AQ non recommandé dans les établissements de santé publics ne s'est pas traduit par une utilisation plus rationnelle des médicaments antipaludiques pour les patients avec un test négatif mais, parallèlement à une politique de traitement par AL plus établie, par un transfert des pratiques de l'AQ pour l'AL.

Toutefois, le non-respect des recommandations concernant les résultats de tests négatifs n'est pas spécifique au Kenya ; des évaluations à grande échelle ont souvent rapporté des résultats similaires dans toute l'Afrique dans le cadre de stratégies de diagnostic reposant sur la microscopie [18,24,25] et les TDR [16,17,26]. Inversement, des études à plus petite échelle menées dans des conditions plus contrôlées ont indiqué que des interventions plus intensives, comprenant une formation en cours d'emploi intégrée accompagnée d'une supervision, ainsi qu'un contrôle et une surveillance renforcés, permettraient d'améliorer le respect des recommandations selon les résultats des tests [27-30]. Un élément important pour aider les professionnels de la santé dans la prise en charge des patients avec un test négatif est le développement et la mise en œuvre de recommandations pour la prise en charge des maladies fébriles non palustres. Cet élément n'a pas encore été abordé au Kenya en 2010, et la chance réside dans la prochaine mise en place à grande échelle des TDR. Enfin, on a observé que 90 % des jeunes enfants avec un test négatif et 82 % des enfants de 5 ans ou plus avec un test négatif étaient traités par antibiotiques. De manière plus pragmatique, si les prescriptions de médicaments sont perçues comme un signe de bonne qualité de soins, le retrait des traitements antipaludiques pour les patients avec un test négatif ne compromettrait pas de façon substantielle ce point de vue. Dans la plupart des cas, la principale différence consisterait uniquement en une omission des traitements antipaludique des prescriptions de polypharmacie existantes. Une recherche qualitative plus approfondie est exigée pour mieux comprendre ces pratiques.

## Conclusions

Dans l'ensemble, les taux de tests de diagnostic du paludisme étaient faibles, et malgré les différentes recommandations pour le diagnostic du paludisme chez les patients âgés de moins et de plus de cinq ans, seules des différences modérées des taux de tests entre les deux groupes d'âge ont été observées dans les établissements disposant de méthodes de diagnostic. De façon plus positive, dans les deux groupes d'âge, les pratiques en matière de traitement par AL ont prévalu sur les autres traitements antipaludiques, et l'utilisation des monothérapies inefficaces était quasi-inexistante. En outre, la grande majorité des patients avec un test positif ont reçu le traitement par AL recommandé, alors que dans le sous-ensemble plus restreint des traitements ne respectant pas les recommandations, l'utilisation de l'association AL+QN a été observée. Toutefois, l'utilisation de médicaments antipaludiques chez les patients testés négatifs était répandue, l'AL constituant le choix de traitement prédominant. De nouvelles améliorations

dans la gestion des cas de paludisme s'imposent urgemment ; elles dépendront de la délivrance d'un module global de gestion des cas, comprenant une mise en place des TDR, une formation de bonne qualité, un suivi post formation, des visites de supervision structurées et un contrôle plus intense. Le récent changement de politique de diagnostic abandonnant le traitement présomptif et recommandant un diagnostic parasitologique pour tous, dans tous les groupes d'âge, devrait être l'occasion de renforcer la qualité de la gestion des cas de paludisme.

## Remerciements

Ces études ont reçu un soutien financier de la part du Wellcome Trust, Royaume-Uni, l'Institut de recherche médicale du Kenya, le Fonds mondial de lutte contre le sida, la tuberculose et le paludisme, l'Initiative du Président des États-Unis contre le paludisme /USAID et Medicines for Malaria Ventures. Les auteurs remercient les équipes sur le terrain et l'ensemble des professionnels de la santé, patients, aidants de patients enfants et adultes malades, qui ont participé à cette étude. Les auteurs remercient Bob Snow pour ses commentaires sur les précédentes versions du manuscrit. Cet article est publié avec la permission du directeur du KEMRI.

## Informations concernant les auteurs

<sup>1</sup>Ministry of Public Health & Sanitation, Division of Malaria Control, P.O. Box 19982-00202, Nairobi, Kenya. <sup>2</sup>Malaria Public Health and Epidemiology Group, KEMRI/Wellcome Trust Research Programme, PO Box 43640, 00100 GPO, Nairobi, Kenya. <sup>3</sup>Centre for Tropical Medicine, Nuffield Department of Clinical Medicine, University of Oxford, CCVTM, Oxford, Royaume-Uni. <sup>4</sup>Center for International Health and Development, Boston University School of Public Health, 85 East Concord Street, 5th Floor, Boston, MA 02118, États-Unis.

## Contribution des auteurs

Les deux auteurs ont contribué au plan de l'étude, à l'analyse des données, à l'interprétation des résultats, aux implications des résultats sur le plan de la politique, et à la réalisation de l'avant-projet et la finalisation de ce manuscrit.

## Conflits d'intérêts

Les auteurs déclarent n'avoir aucun conflit d'intérêt.

Reçu le 25 octobre 2010 Accepté le 7 janvier 2011

Publié le 7 janvier 2011

## Références

- Whitty CJM, Chandler C, Ansah E, Leslie T, Staedke S: **Deployment of ACT antimalarials for treatment of malaria: challenges and opportunities.** *Malaria J* 2008, **7**(Suppl 1):S7.
- World Health Organization: *Guidelines for the Treatment of Malaria* WHO, Geneva; 2006.
- East African Network for Monitoring of Antimalarial Treatment (EANMAT): **The efficacy of antimalarial monotherapies, sulphadoxine-pyrimethamine and amodiaquine in East Africa: Implications for sub-regional policy.** *Trop Med Int Health* 2003, **8**:860-867.
- Adjuik M, Agnamey P, Babiker A, Borrmann S, Brasseur P, Cisse M, Cobelens F, Diallo S, Faucher JF, Garner P, Gikunda S, Kremsner PG, Krishna S, Lell B, Loolpapit M, Matsiegui PB, Missinou MA, Mwanza J, Ntoumi F, Olliaro P, Osimbo P, Rezbach P, Some E, Taylor WR: **Amodiaquine-artesunate versus amodiaquine for uncomplicated Plasmodium falciparum malaria in African children: A randomised, multicentre trial.** *Lancet* 2002, **359**:1365-1372.
- Ministry of Health: *National Guidelines for Diagnosis, Treatment and Prevention of Malaria for Health Workers* Nairobi, Republic of Kenya; 2006.
- Amin AA, Zurovac D, Kangwana BB, Greenfield J, Otieno DN, Akhwale WS, Snow RW: **The challenges of changing national malaria drug policy to artemisinin-based combinations in Kenya.** *Malar J* 2007, **6**:72.
- Njogu J, Akhwale W, Hamer DH, Zurovac D: **Health facility and health worker readiness to deliver new national treatment policy for malaria in Kenya.** *East Afr Med J* 2008, **85**:213-221.
- Zurovac D, Njogu J, Akhwale W, Hamer DH, Snow RW: **Translation of**



- artemether-lumefantrine treatment policy into paediatric clinical practice: an early experience from Kenya. *Trop Med Int Health* 2008, **13**:99-107.
9. Skarbinski J, Ouma PO, Causer LM, Kariuki SK, Barnwell JW, Alaii JA, de Oliveira AM, Zurovac D, Larson BA, Snow RW, Rowe AK, Laserson KF, Akhwale WS, Slutsker L, Hamel MJ: **Effect of malaria rapid diagnostic tests on the management of uncomplicated malaria with artemetherlumefantrine in Kenya: a cluster randomized trial.** *Am J Trop Med Hyg* 2009, **80**:919-26.
  10. Ministry of Health: *National Guidelines for Diagnosis, Treatment and Prevention of Malaria for Health Workers* Nairobi, Republic of Kenya; 2008.
  11. Zurovac D, Njogu J, Akhwale W, Hamer DH, Larson BA, Snow RW: **Effects of revised diagnostic recommendations on malaria treatment practices across age groups in Kenya.** *Trop Med Int Health* 2008, **13**:784-787.
  12. Wasunna B, Zurovac D, Goodman CA, Snow RW: **Why don't health workers prescribe ACT? A qualitative study of factors affecting the prescription of artemether-lumefantrine.** *Malar J* 2008, **7**:29.
  13. Ministry of Health: *Participant's Manual for Diagnosis, Management and Prevention of Malaria in Kenya* Nairobi, Republic of Kenya; 2008.
  14. Ministry of Public Health and Sanitation: *National Guidelines for Diagnosis, Treatment and Prevention of Malaria in Kenya* Division of Malaria Control, Nairobi; 2010.
  15. Nankabirwa J, Zurovac D, Njogu JN, Rwakimari JB, Counihan H, Snow RW, Tibenderana J: **Malaria misdiagnosis in Uganda - implications for policy change.** *Malar J* 2009, **8**:66.
  16. Rowe AK, Ponce de León GF, Mihigo J, Santelli AC, Miller NP, Van-Dúnem P: **Quality of malaria case management at outpatient health facilities in Angola.** *Malar J* 2009, **8**:275.
  17. Hamer DH, Ndhlovu M, Zurovac D, Fox M, Yeboah-Antwi K, Chanda P, Sipilinyambe N, Simon LJ, Snow RW: **Improved diagnostic testing and malaria treatment practices in Zambia.** *JAMA* 2007, **297**:2227-2231.
  18. Chandler CI, Chonya S, Boniface G, Juma K, Reyburn H, Whitty CJ: **The importance of context in malaria diagnosis and treatment decisions - a quantitative analysis of observed clinical encounters in Tanzania.** *Trop Med Int Health* 2008, **13**:1131-1142.
  19. Zurovac D, Ndhlovu M, Sipilinyambe N, Chanda P, Hamer DH, Simon JL, Snow RW: **Paediatric malaria case-management with artemetherlumefantrine in Zambia: a repeat cross-sectional study.** *Malar J* 2007, **6**:31.
  20. Zurovac D, Tibenderana JK, Nankabirwa J, Ssekitooleko J, Njogu JN, Rwakimari JB, Meek S, Talisuna A, Snow RW: **Malaria case-management under artemether-lumefantrine treatment policy in Uganda.** *Malar J* 2008, **7**:181.
  21. Zurovac D, Rowe AK, Ochola SA, Noor AM, Midia B, English M, Snow RW: **Predictors of the quality of health worker treatment practices for uncomplicated malaria at government health facilities in Kenya.** *Int J of Epidem* 2004, **33**:1080-1091.
  22. Zurovac D, Midia B, Ochola SA, English M, Snow RW: **Microscopy and outpatient malaria case management among older children and adults in Kenya.** *Trop Med Int Health* 2006, **11**:432-440.
  23. Lubell YH, Reyburn H, Mbakilwa H, Chonya S, Whitty CJM, Mills A: **The impact of response to the results of diagnostic tests for malaria: cost-benefit analysis.** *BMJ* 2008, **336**:202-205.
  24. Barat L, Chipipa J, Kolczak M, Sukwa T: **Does availability of blood slide microscopy for malaria at health centres improve the management of persons with fever in Zambia.** *Am J Trop Med Hyg* 1999, **60**:1024-1030.
  25. Reyburn H, Mbakilwa H, Mwangi R, Mwerinde O, Olomi R, Drakeley C, Whitty CJM: **Rapid diagnostic tests compared with malaria microscopy for guiding outpatient treatment of febrile illness in Tanzania: randomised trial.** *BMJ* 2007, **334**:403.
  26. Bisoffi Z, Sirima BS, Angheben A, Lodesani C, Gobbi F, Tinto H, Van den Ende J: **Rapid malaria diagnostic tests vs. clinical management of malaria in rural Burkina Faso: safety and effect on clinical decisions. A randomized trial.** *Trop Med Int Health* 2009, **14**:1-8.
  27. Ssekabira U, Bukirwa H, Hopkins H, Namagembe A, Weaver MR, Sebuyira LM, Quick L, Staedke S, Yeka A, Kiggundu M, Schneider G, McAdam K, Wabwire-Mangen F, Dorsey G: **Improved malaria case management after integrated team-based training of health care workers in Uganda.** *Am J Trop Med Hyg* 2008, **79**:826-833.
  28. Ngasala B, Mubi M, Warsame M, Petzold MG, Massele AY, Gustafsson LL, Tomson G, Premji Z, Bjorkman A: **Impact of training in clinical and microscopy diagnosis of childhood malaria on antimalarial drug prescription and health outcome at primary health care level in Tanzania: A randomized controlled trial.** *Malar J* 2008, **7**:199.
  29. Williams HA, Causer L, Metta E, Malila A, O'Reilly T, Abdulla S, Kachur SP, Bloland PB: **Dispensary level pilot implementation of rapid diagnostic tests: an evaluation of RDT acceptance and usage by providers and patients - Tanzania, 2005.** *Malar J* 2008, **7**:239.
  30. D'Acremont V, Kahama-Maró J, Mtasiwa D, Genton B, Lengeler C: **Massive reduction of antimalarial prescriptions after Rapid Diagnostic Tests implementation in Dar es Salaam, Tanzania.** *Abstract 577 in Am J Trop Med Hyg Suppl of the 57th Annual Meeting of the ASTMH, New Orleans, USA 2008.*

doi:10.1186/1475-2875-10-1

**Cet article est une traduction de l'anglais, et doit être cité comme suit :** Juma et Zurovac : **Changes in health workers' malaria diagnosis and treatment practices in Kenya.** *Malaria Journal* 2011 **10**:1.
